# Supplementary material for: Facile preparation of hierarchically porous carbons from metal-organic gels and their application in energy storage
Source: PubMed Central journal article supplement — Sci Rep. 2013 Jun 3;3:1935. doi: 10.1038/srep01935 (PMC3669942; doi:10.1038/srep01935), 2013-06-03
Supplement: srep01935-s1.pdf [file srep01935-s1.pdf]

Electronic Supplementary Information for

Facile preparation of hierarchically porous carbons from  
metal-organic gels and their application in energy storage

Wei Xia, Bin Qiu, Dingguo Xia & Ruqiang Zou\*

\* rzou@pku.edu.cn

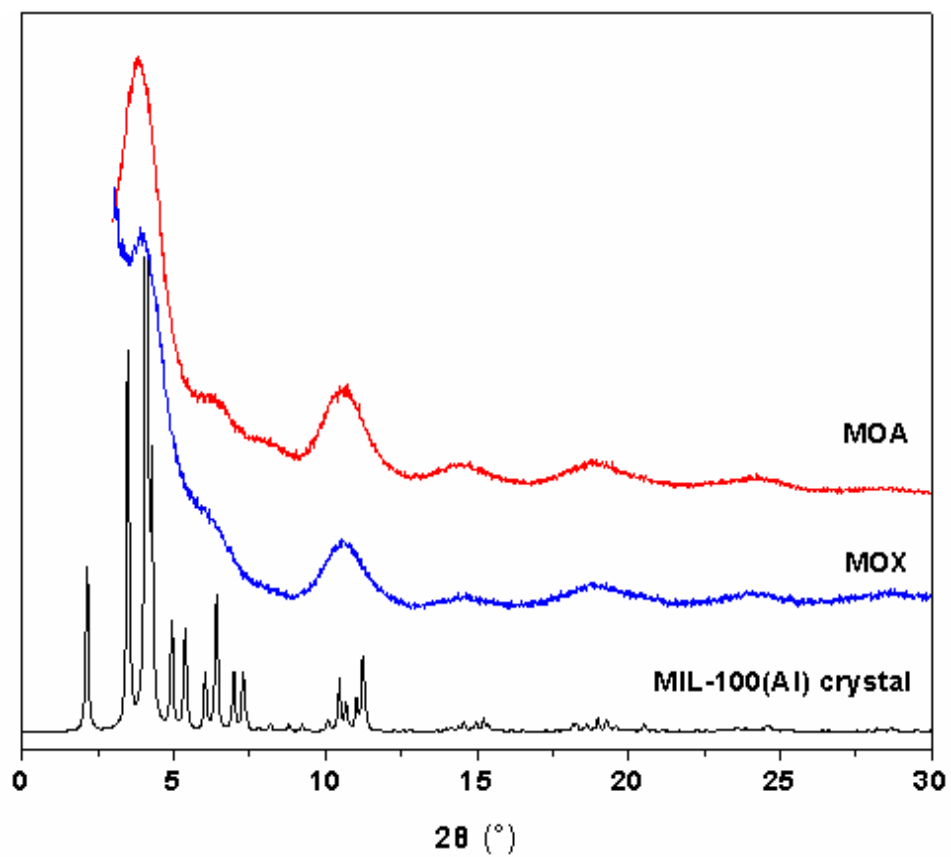

**Figure S1.** PXRD patterns of MOA, MOX and the simulated one from crystallographic information file of the MIL-100(Al) crystal.

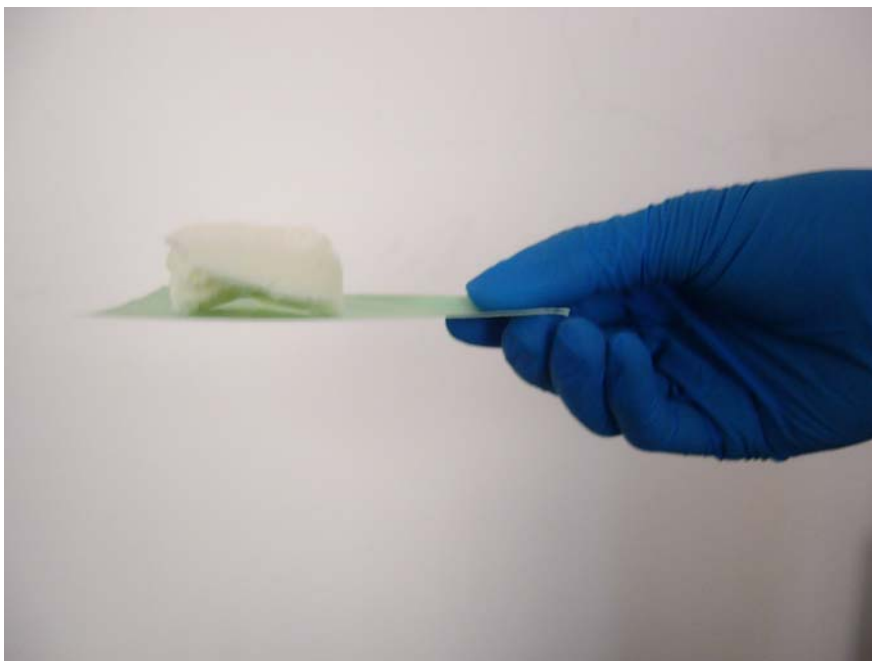

**Figure S2.** Photograph of a super light MOA monolith standing on a piece of note paper.

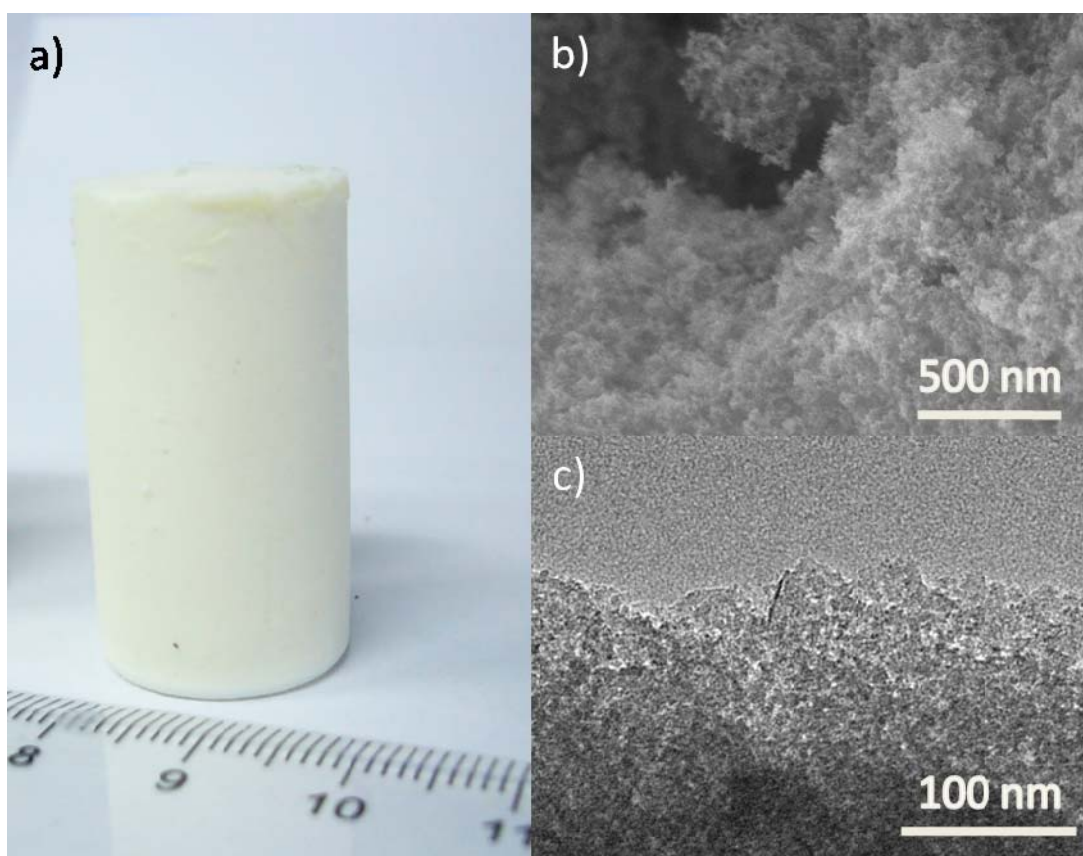

**Figure S3.** Images of the MOA: (a) Digital photograph, (b) SEM and c) TEM.

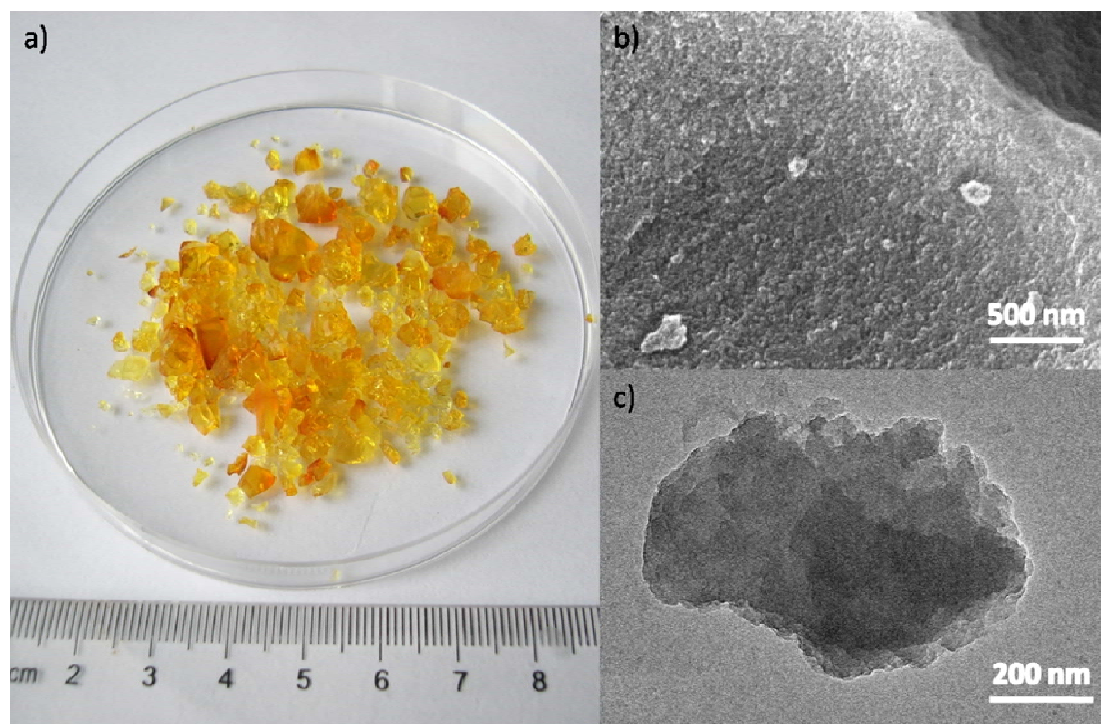

**Figure S4.** View of MOX samples: (a) Digital photograph, (b) SEM and (c) TEM.

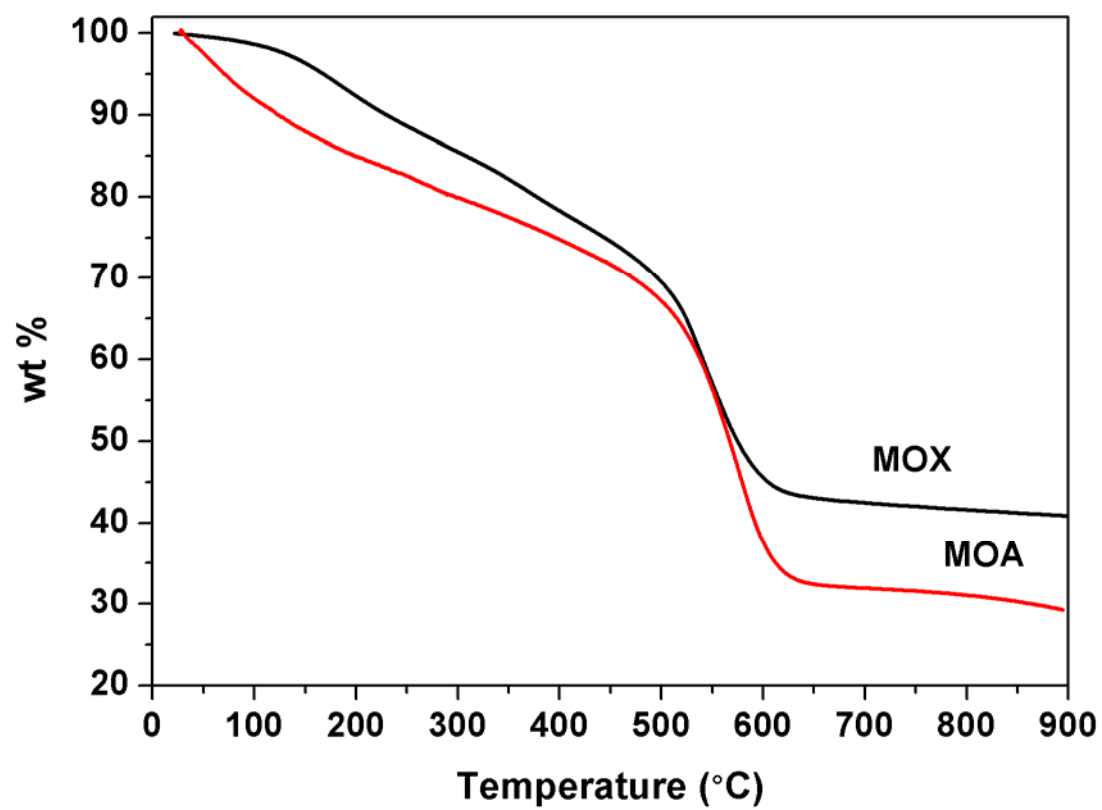

**Figure S5.** TGA curves of MOX and MOA.

**Table S1** Elemental analysis of the carbon products.

| Sample | C (wt %) | H (wt %) | N (wt %) | O (wt %) |
|--------|----------|----------|----------|----------|
| MOX-C  | 93.4     | 0.8      | 0.4      | 5.4      |
| MOA-C  | 91.3     | 2.1      | 0.5      | 6.1      |

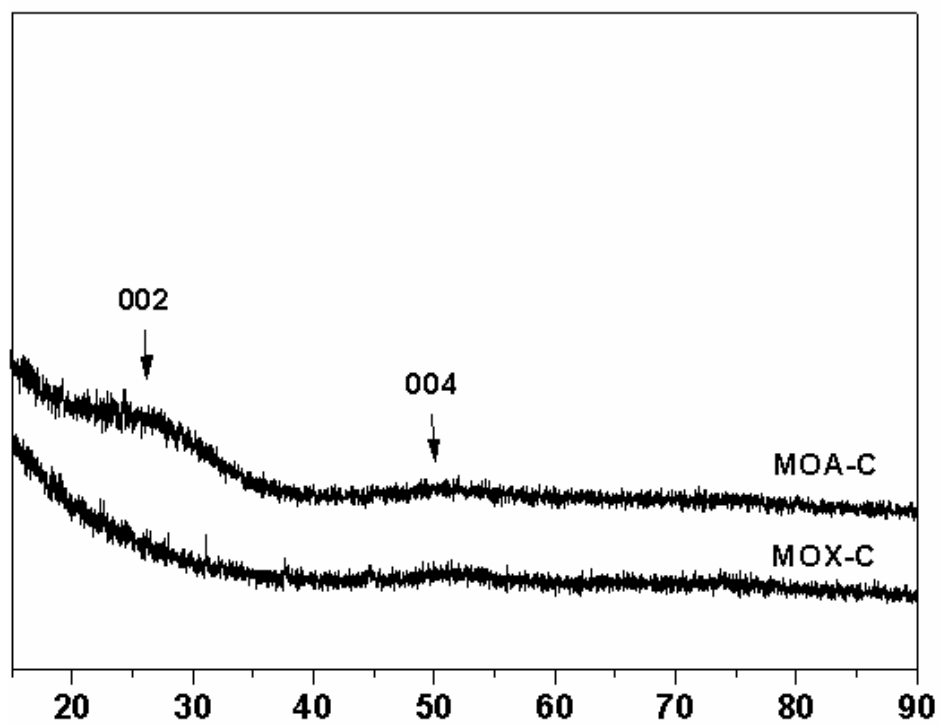

**Figure S6.** PXRD patterns of the MOX-C and MOA-C.

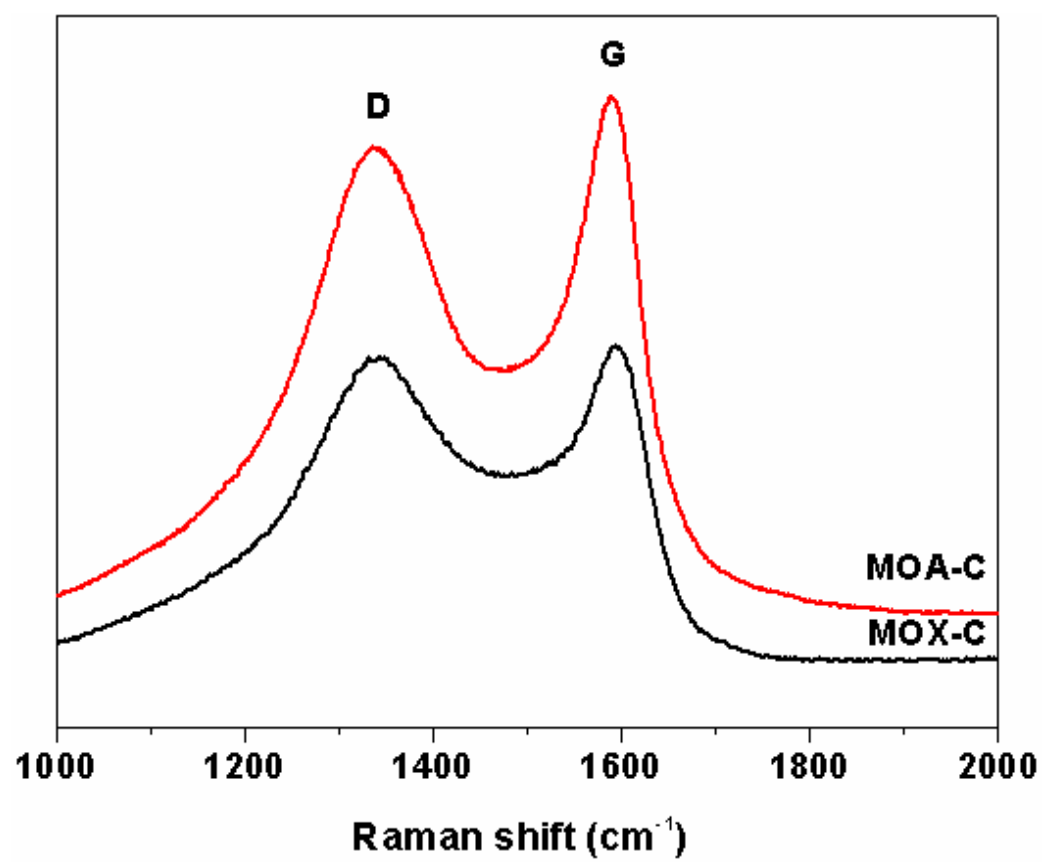

**Figure S7.** Raman spectra of MOX-C and MOA-C.

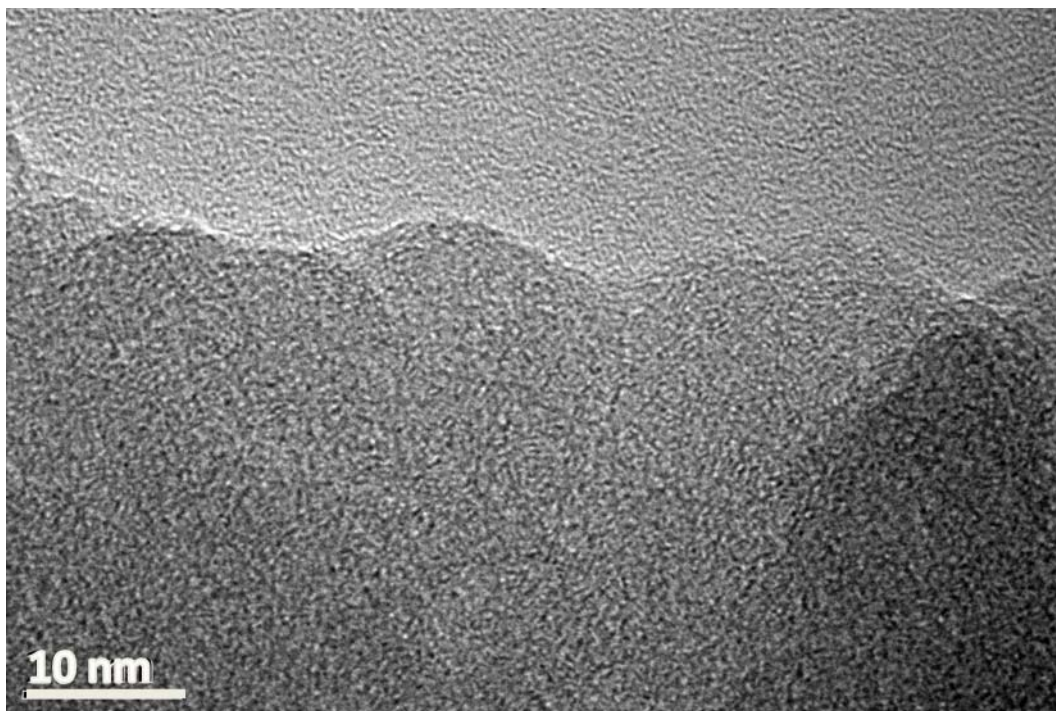

**Figure S8.** TEM image of MOX-C.

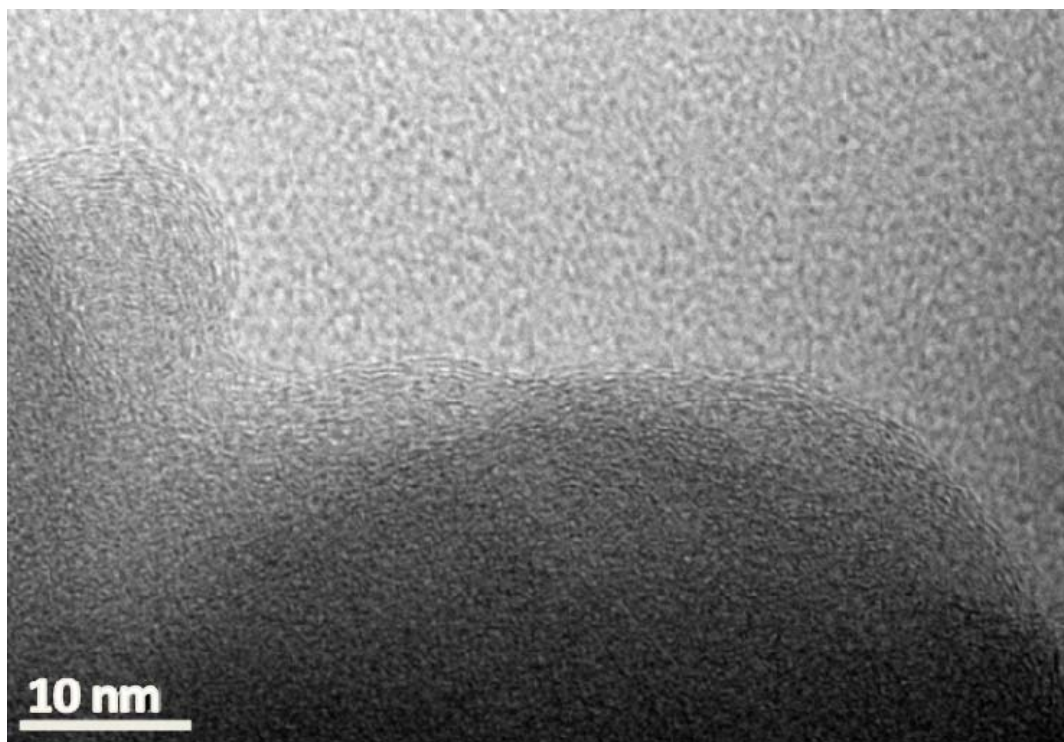

**Figure S9.** TEM image of MOA-C.

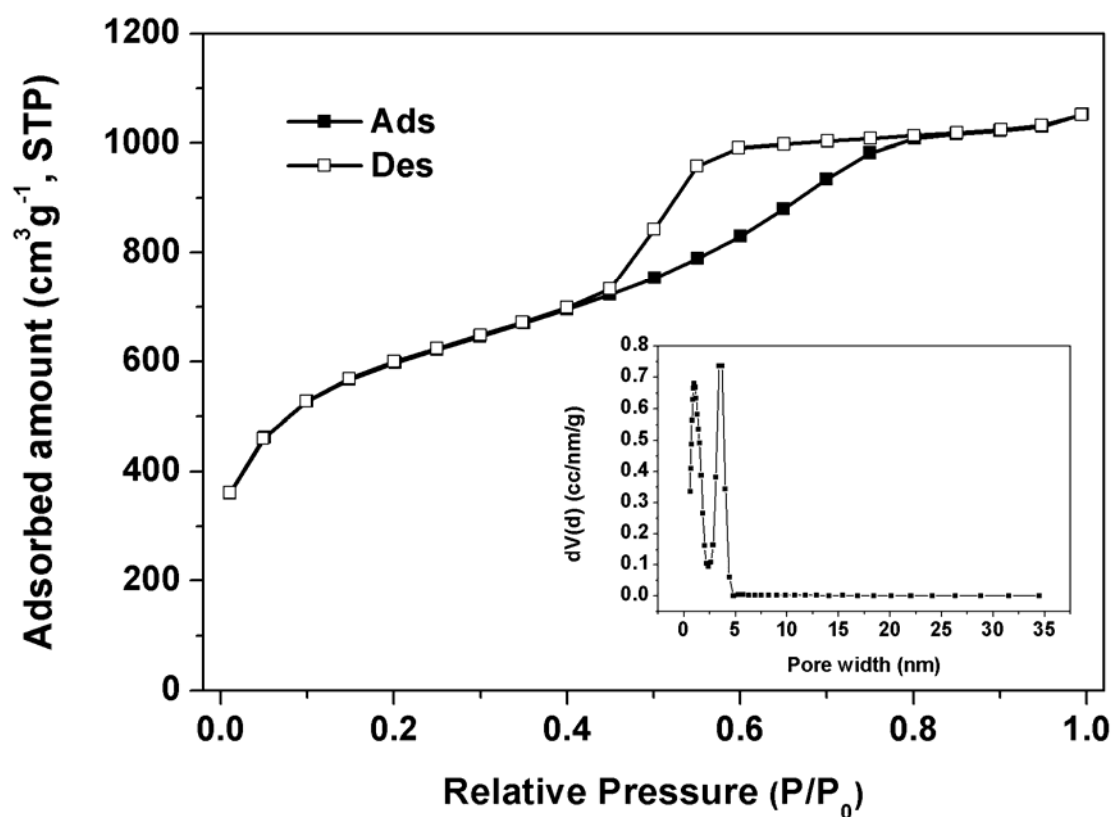

**Figure S10.** N<sub>2</sub> sorption isotherms at 77K and pore size distributions (inset) based on the QSDFT model of MOX derived carbon before KOH treatment. The BET surface area and pore volume are 2131 m<sup>2</sup>g<sup>-1</sup> and 1.63 cm<sup>3</sup>g<sup>-1</sup>, respectively.

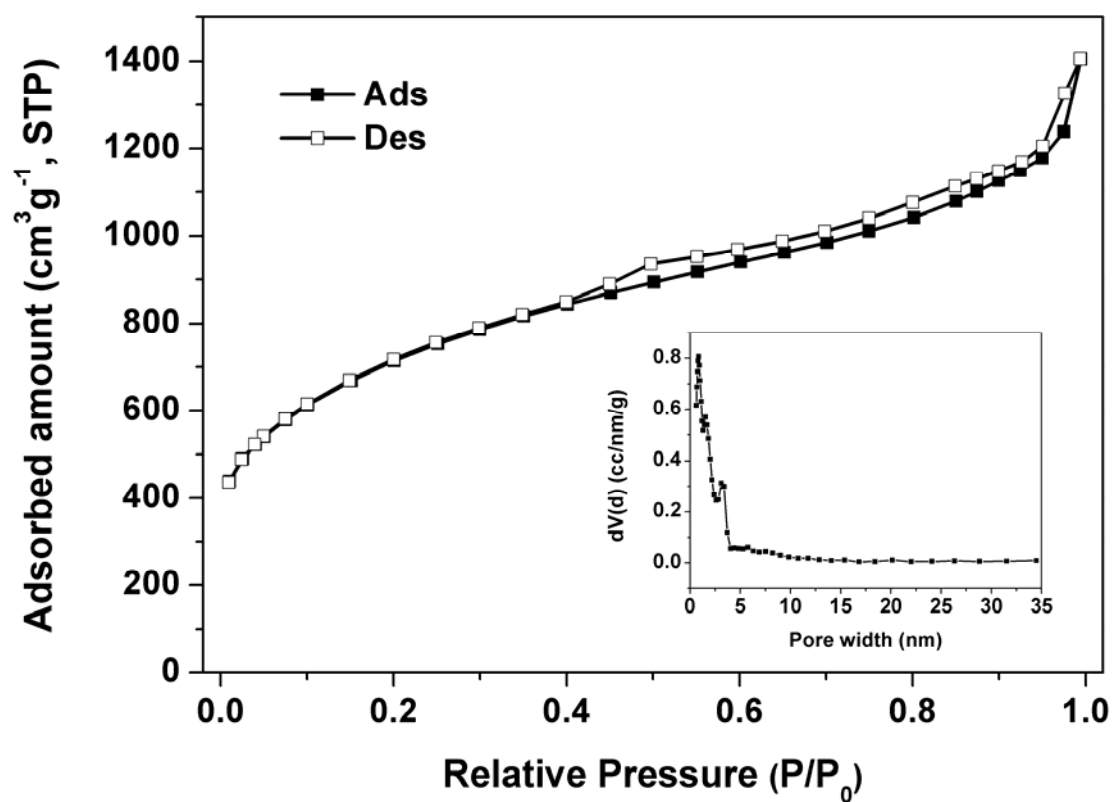

**Figure S11.** N<sub>2</sub> sorption isotherms at 77K and pore size distributions (inset) based on the QSDFT model of KOH treated MOA-C sample. The BET surface area and pore volume are 2523 m<sup>2</sup>g<sup>-1</sup> and 2.17 cm<sup>3</sup>g<sup>-1</sup>, respectively. After KOH activation, the BET surface area of the sample was enhanced (1820 m<sup>2</sup>g<sup>-1</sup> for MOA-C). However, the pore volume dramatically dropped down (3.22 cm<sup>3</sup>g<sup>-1</sup> for MOA-C) due to the collapse of the macropores.

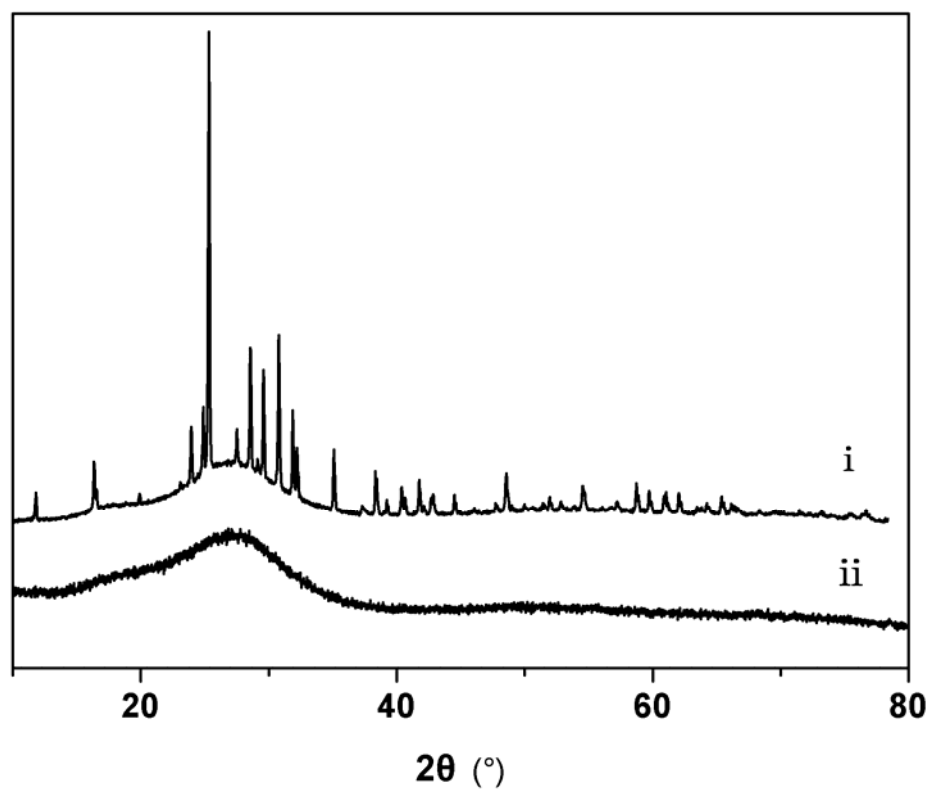

**Figure S12.** PXRD patterns of a mixture of MOA-C and sulfur (i) before heating and (ii) after heating at 300 °C.

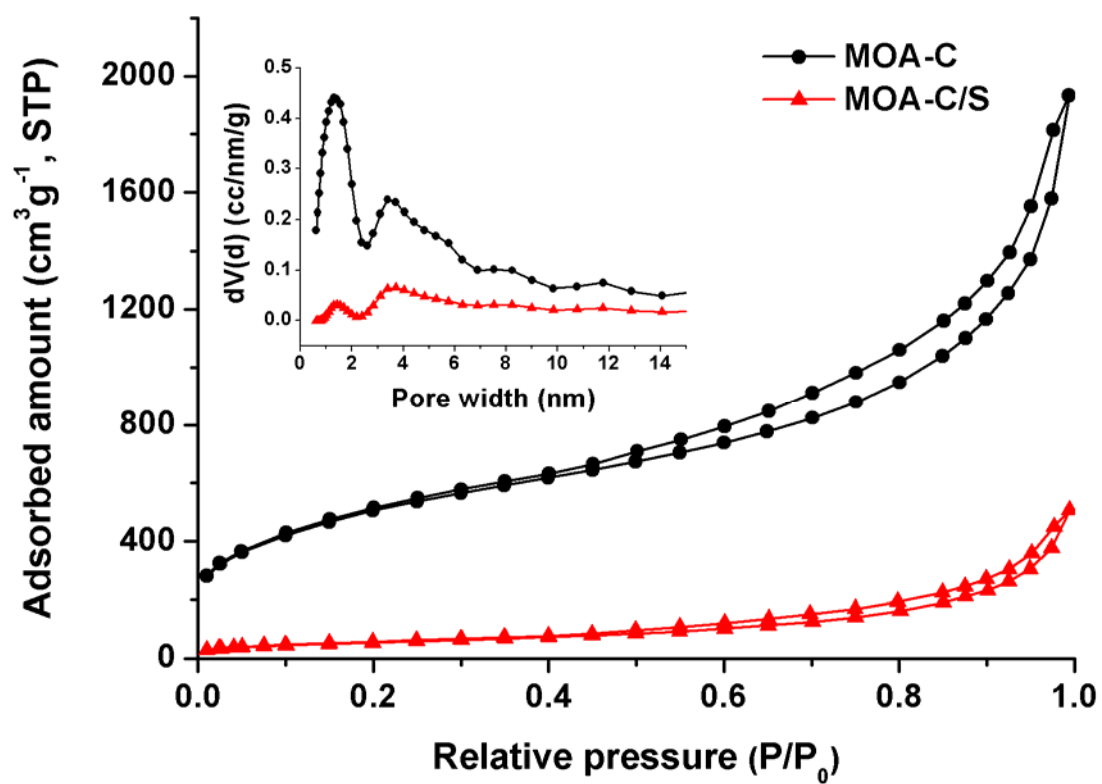

**Figure S13.**  $N_2$  sorption isotherms at 77K and pore size distributions (inset) based on the QSDFT model of MOA-C before and after sulfur impregnation.

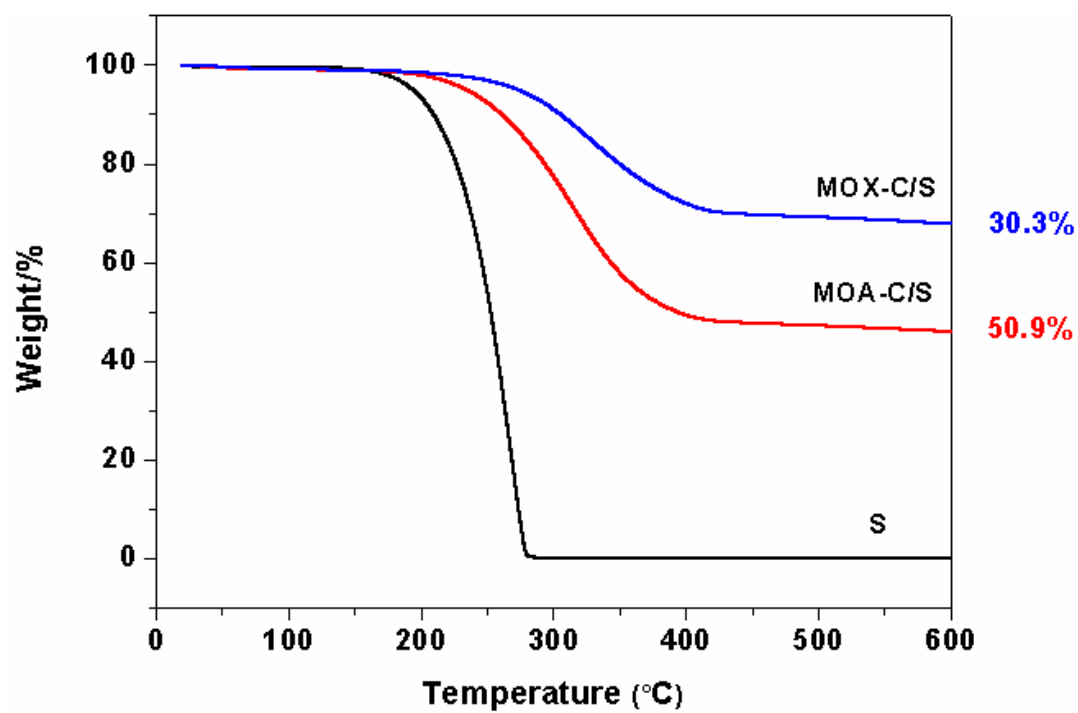

**Figure S14.** TGA curves of bare sulfur, MOX-C/S and MOA-C/S composites.
